# Supplementary material for: Nicotine promotes e-cigarette vapour-induced lung inflammation and structural alterations
Source: PubMed Central journal article supplement — Eur Respir J. 2023 Jun 22;61(6):2200951. doi: 10.1183/13993003.00951-2022 (PMC10285110; doi:10.1183/13993003.00951-2022), 2023-06-22

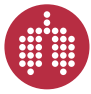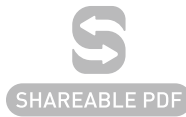

# Nicotine promotes e-cigarette vapour-induced lung inflammation and structural alterations

Elsa T. Roxlau<sup>1,10</sup>, Oleg Pak<sup>1,10</sup>, Stefan Hadzic<sup>1</sup>, Claudia F. Garcia-Castro<sup>1</sup>, Marija Gredic<sup>1</sup>, Cheng-Yu Wu<sup>1</sup>, Julia Schäffer<sup>1</sup>, Balachandar Selvakumar<sup>1,2</sup>, Alexandra Pichl<sup>1</sup>, David Spiegelberg<sup>1</sup>, Janik Deutscher<sup>1</sup>, Mariola Bednorz<sup>1</sup>, Katharina Schäfer<sup>1</sup>, Simone Kraut<sup>1</sup>, Djuro Kosanovic<sup>1,3</sup>, Esraa M. Zeidan<sup>1,4</sup>, Baktybek Kojonazarov<sup>1,5</sup>, Susanne Herold<sup>1</sup>, Ievgen Strielkov<sup>1</sup>, Andreas Guenther<sup>1</sup>, Jochen Wilhelm<sup>1,5</sup>, Mohamed M.A. Khalifa<sup>4</sup>, Ashraf Taye<sup>6</sup>, Ralf P. Brandes<sup>7</sup>, Matthias Hecker<sup>1</sup>, Friedrich Grimminger<sup>1</sup>, Hossein A. Ghofrani<sup>1,8</sup>, Ralph T. Schermuly<sup>1</sup>, Werner Seeger<sup>1,5,9</sup>, Natascha Sommer<sup>1</sup> and Norbert Weissmann<sup>1</sup>

<sup>1</sup>Justus Liebig University, Excellence Cluster Cardio-Pulmonary Institute (CPI), Universities of Giessen and Marburg Lung Center (UGMLC), Member of the German Center for Lung Research (DZL), Giessen, Germany. <sup>2</sup>Sharjah Institute of Medical Research (SIMR), College of Medicine – University of Sharjah (UoS), Sharjah, United Arab Emirates. <sup>3</sup>I.M. Sechenov First Moscow State Medical University (Sechenov University), Moscow, Russia. <sup>4</sup>Department of Pharmacology and Toxicology, Faculty of Pharmacy, Minia University, El-Minia, Egypt. <sup>5</sup>Institute for Lung Health (ILH), Giessen, Germany. <sup>6</sup>Department of Pharmacology and Toxicology, Faculty of Pharmacy, South Valley University, Qena, Egypt. <sup>7</sup>Institute for Cardiovascular Physiology, Goethe University, Cardio-Pulmonary Institute (CPI), Frankfurt, Germany. <sup>8</sup>Department of Medicine, Imperial College London, London, UK. <sup>9</sup>Max Planck Institute for Heart and Lung Research, Bad Nauheim, Germany. <sup>10</sup>Joint first authors.

Corresponding author: Natascha Sommer ([natascha.sommer@innere.med.uni-giessen.de](mailto:natascha.sommer@innere.med.uni-giessen.de))

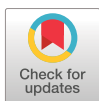

Shareable abstract (@ERSpublications)

**E-cigarette use, particularly with nicotine-containing vapour, is a harmful alternative to tobacco smoking. Nicotine-containing e-cigarette vapour increases pulmonary endothelial permeability, induces inflammation and causes airway and parenchymal alterations.** <https://bit.ly/40s24n9>

**Cite this article as:** Roxlau ET, Pak O, Hadzic S, *et al.* Nicotine promotes e-cigarette vapour-induced lung inflammation and structural alterations. *Eur Respir J* 2023; 61: 2200951 [DOI: 10.1183/13993003.00951-2022].

This single-page version can be shared freely online.

Copyright ©The authors 2023.

This version is distributed under the terms of the Creative Commons Attribution Non-Commercial Licence 4.0. For commercial reproduction rights and permissions contact [permissions@ersnet.org](mailto:permissions@ersnet.org)

This article has an editorial commentary:  
<https://doi.org/10.1183/13993003.00886-2023>

Received: 9 May 2022  
Accepted: 19 March 2023

## Abstract

**Background** Electronic cigarette (e-cigarette) vapour is gaining popularity as an alternative to tobacco smoking and can induce acute lung injury. However, the specific role of nicotine in e-cigarette vapour and its long-term effects on the airways, lung parenchyma and vasculature remain unclear.

**Results** *In vitro* exposure to nicotine-containing e-cigarette vapour extract (ECVE) or to nicotine-free e-cigarette vapour extract (NF ECVE) induced changes in gene expression of epithelial cells and pulmonary arterial smooth muscle cells (PASMCs), but ECVE in particular caused functional alterations (*e.g.* a decrease in human and mouse PASMC proliferation by 29.3±5.3% and 44.3±8.4%, respectively). Additionally, acute inhalation of nicotine-containing e-cigarette vapour (ECV) but not nicotine-free e-cigarette vapour (NF ECV) increased pulmonary endothelial permeability in isolated lungs. Long-term *in vivo* exposure of mice to ECV for 8 months significantly increased the number of inflammatory cells, in particular lymphocytes, compared to control and NF ECV in the bronchoalveolar fluid (BALF) (ECV: 853.4±150.8 cells·mL<sup>-1</sup>; control: 37.0±21.1 cells·mL<sup>-1</sup>; NF ECV: 198.6±94.9 cells·mL<sup>-1</sup>) and in lung tissue (ECV: 25.7±3.3 cells·mm<sup>-3</sup>; control: 4.8±1.1 cells·mm<sup>-3</sup>; NF ECV: 14.1±2.2 cells·mm<sup>-3</sup>). BALF cytokines were predominantly increased by ECV. Moreover, ECV caused significant changes in lung structure and function (*e.g.* increase in airspace by 17.5±1.4% compared to control), similar to mild tobacco smoke-induced alterations, which also could be detected in the NF ECV group, albeit to a lesser degree. In contrast, the pulmonary vasculature was not significantly affected by ECV or NF ECV.

**Conclusions** NF ECV components induce cell type-specific effects and mild pulmonary alterations, while inclusion of nicotine induces significant endothelial damage, inflammation and parenchymal alterations.

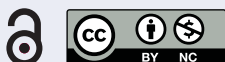

Supplement: ERJ-00951-2022.Shareable.pdf [file ERJ-00951-2022.Shareable.pdf]
