# Supplementary material for: Nicotine promotes e-cigarette vapour-induced lung inflammation and structural alterations
Source: PubMed Central journal article supplement — Eur Respir J. 2023 Jun 22;61(6):2200951. doi: 10.1183/13993003.00951-2022 (PMC10285110; doi:10.1183/13993003.00951-2022), 2023-06-22
Supplement: ERJ-00951-2022.Figure_S1.pdf [file ERJ-00951-2022.Figure_S1.pdf]

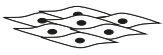

# In vitro

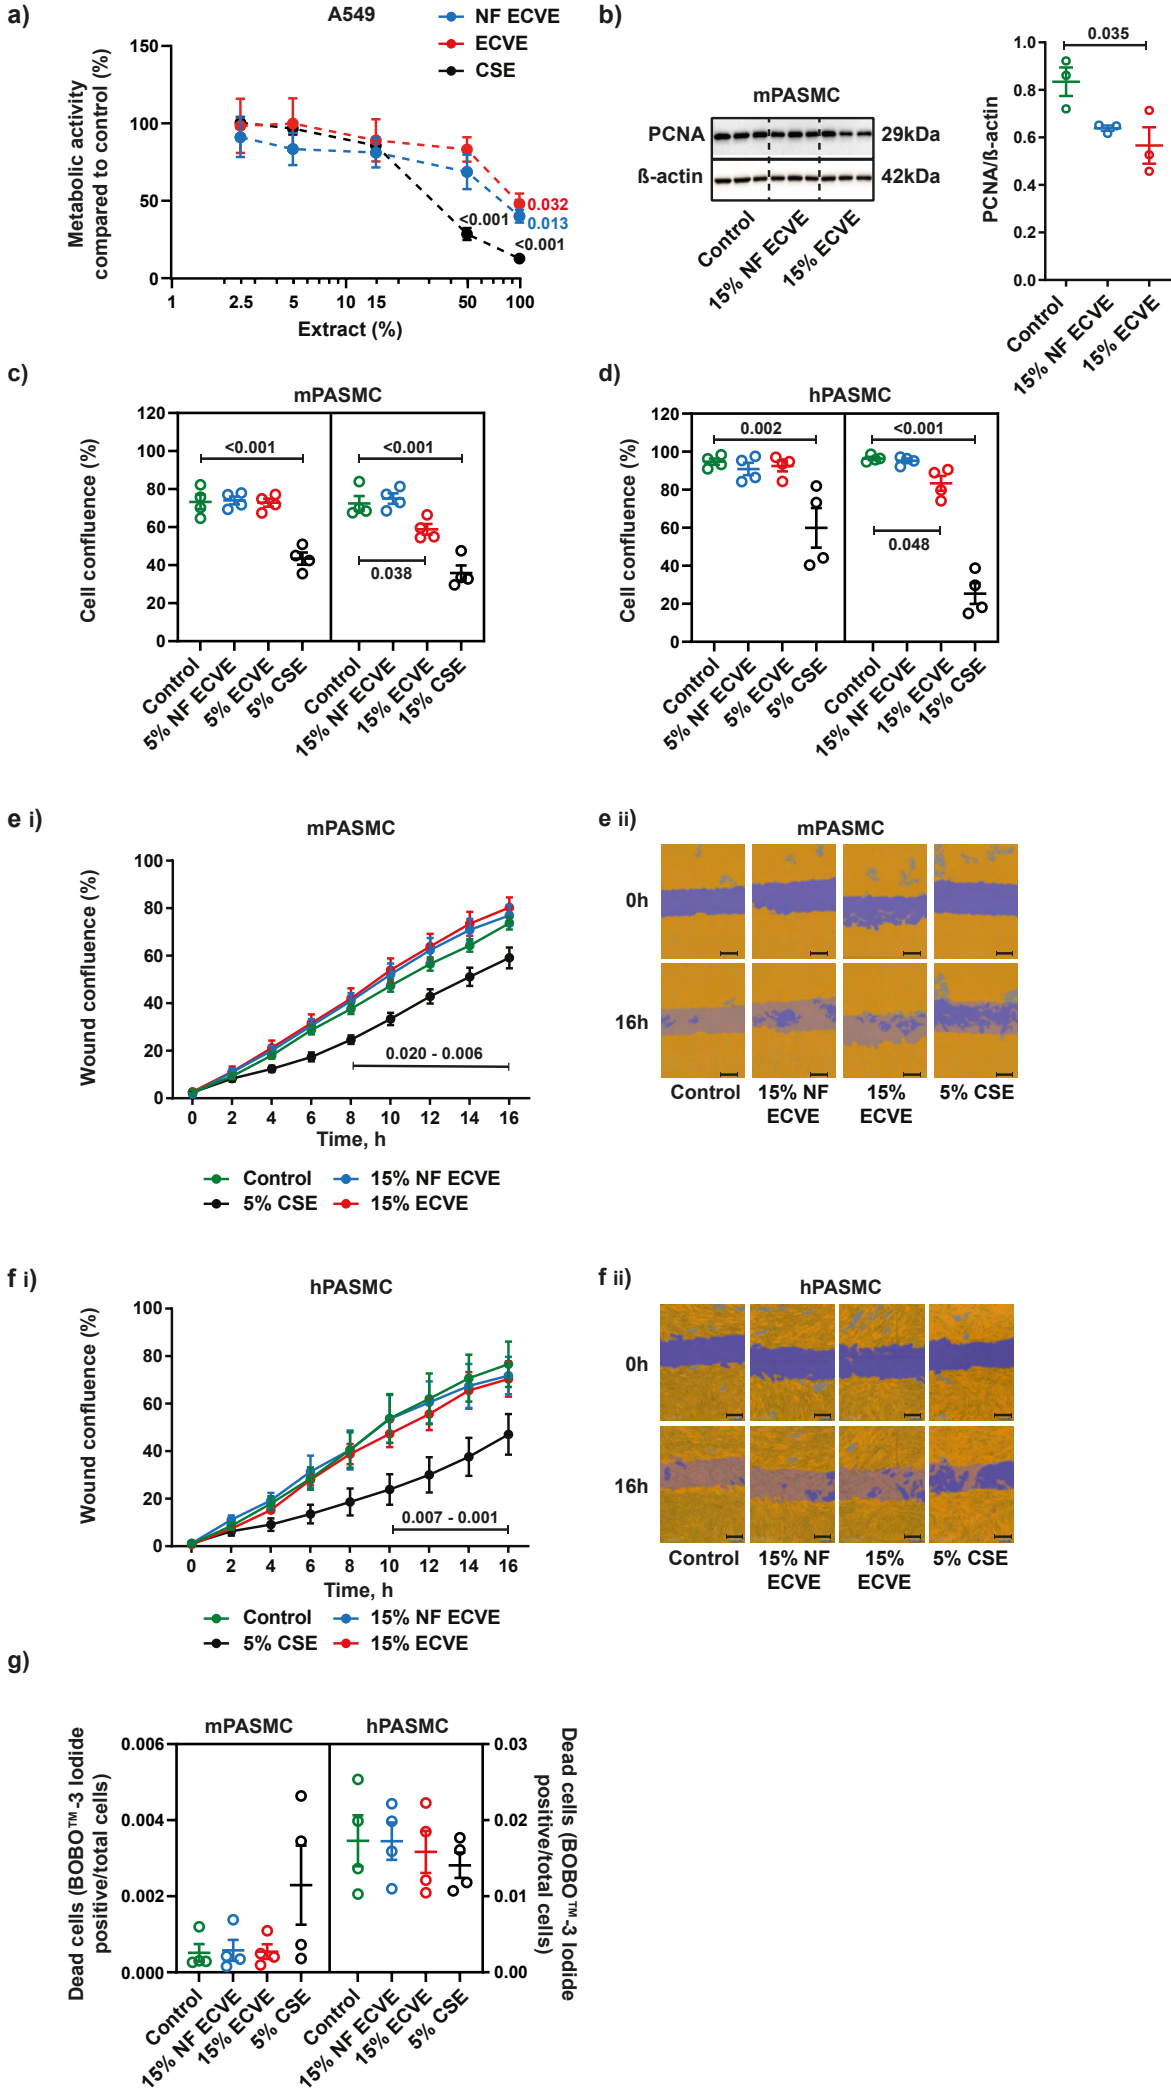

**Supplementary figure S1. Effect of *in vitro* ECVE or NF ECVE exposure on metabolic activity, cell confluence, PCNA protein expression and migration.**

**a)** Cell metabolic activity of human epithelial cells from A549 cell line (n=5) after exposure to different concentrations of either nicotine-free e-cigarette vapour extract (NF ECVE), nicotine-containing e-cigarette vapour extract (ECVE) or conventional cigarette smoke extract (CSE). Data are presented as percent of control. Significant p-values in comparison to control. **b)** Protein expression of PCNA normalised to expression of  $\beta$ -actin in mPASMC exposed to either 15% NF ECVE or 15 % ECVE (n=3). **c-d)** Cell confluence (n=4 each) of mPASMC and hPAMSC exposed to either NF ECVE, ECVE or CSE. **e, f)** Wound confluence (% of confluence at 0h) of mPASMC (**e i**, n=10) and hPASMC (**f i**, n=5) after exposure to either 15% NF ECVE, 15% ECV, 5% CSE or control. Depicted are representative pictures of wound healing assays, used for determination of cell migration (**e ii**, **f ii**). Scale bars 300 $\mu$ m. **g)** Dead cell counts (n=4 each) for mPASMC and hPAMSC exposed to either NF ECVE, ECVE or CSE.

Controls were treated with medium without ECVE, NF ECVE or CSE. n for mPASMC, and hPASMC represent independent cell isolations per group, n for A549 cells represent independent experiments per group. Statistical analysis was performed by one-way ANOVA with Tukeys post hoc-test. Data are presented as mean  $\pm$  SEM.
