# Supplementary material for: Nicotine promotes e-cigarette vapour-induced lung inflammation and structural alterations
Source: PubMed Central journal article supplement — Eur Respir J. 2023 Jun 22;61(6):2200951. doi: 10.1183/13993003.00951-2022 (PMC10285110; doi:10.1183/13993003.00951-2022), 2023-06-22
Supplement: ERJ-00951-2022.Figure_S2.pdf [file ERJ-00951-2022.Figure_S2.pdf]

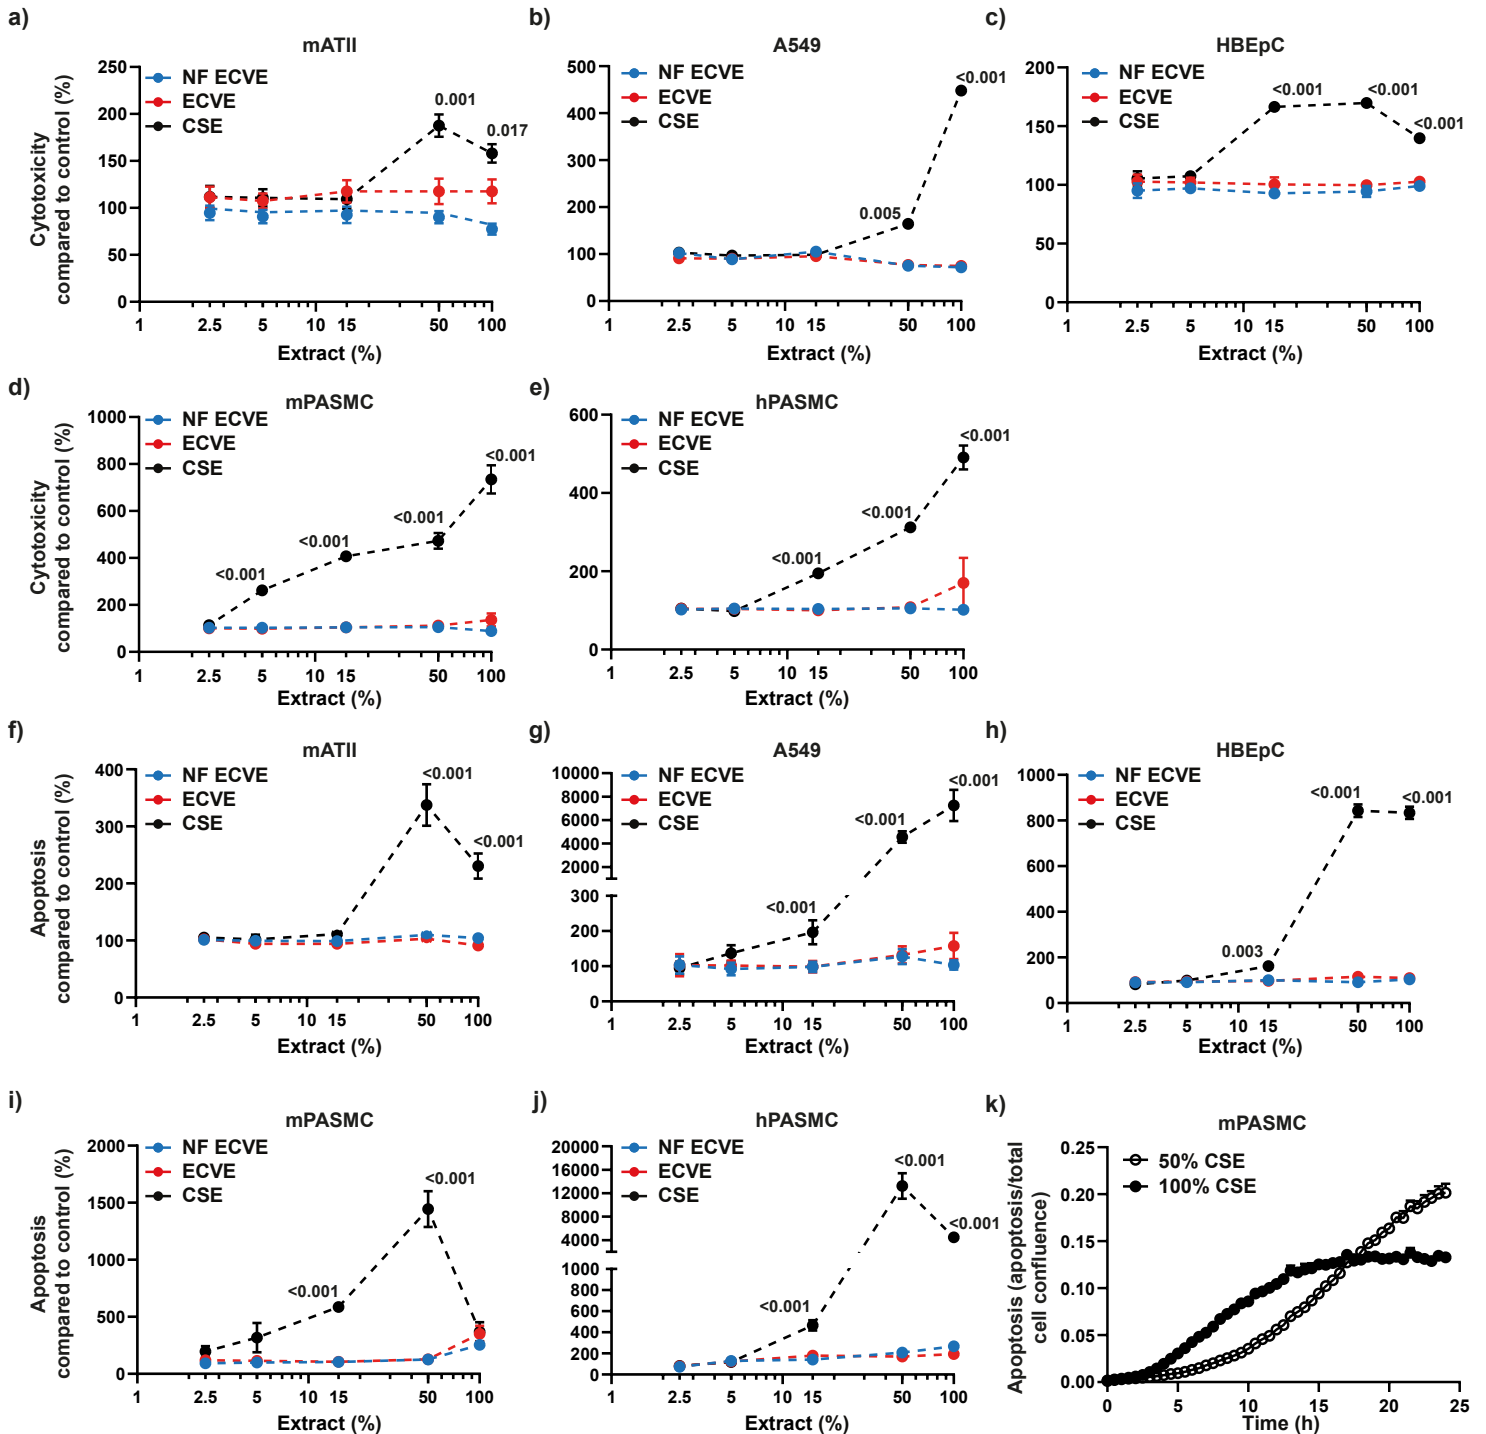

### Supplementary figure S2. Effect of *in vitro* ECVE or NF ECVE exposure on cytotoxicity and apoptosis.

**a-e** Cytotoxicity assays of primary mouse ATII cells (**a**, mATII, n=3), A549 cells (**b**, n=3), HBEpC (**c**, n=3), primary mPASC (**d**, n=3), and primary hPASC (**e**, n=3). **f-j** Apoptosis assays of mATII cells (**f**, n=5), A549 cells (**g**, n=4), HBEpC (**h**, n=4), mPASC (**i**, n=4), hPASC (**j**, n=4). Cells were either exposed to nicotine-free e-cigarette vapour extract (NF ECVE), nicotine-containing e-cigarette vapour extract (ECVE) or conventional cigarette smoke extract (CSE). **k** Kinetics of apoptosis in mPASC exposed to 50% and 100% CSE (n=4).

Controls were treated with medium without ECVE, NF ECVE or CSE. n for mATII cells, mPASC, and hPASC represent independent cell isolations per group, n for A549 cells and HBEpC represent independent experiments per group. Statistical analysis was performed by one-way ANOVA with Tukeys post hoc-test. Significant p-values in comparison to CSE are presented. Data are presented as mean  $\pm$  SEM.
