# Supplementary material for: Nicotine promotes e-cigarette vapour-induced lung inflammation and structural alterations
Source: PubMed Central journal article supplement — Eur Respir J. 2023 Jun 22;61(6):2200951. doi: 10.1183/13993003.00951-2022 (PMC10285110; doi:10.1183/13993003.00951-2022), 2023-06-22
Supplement: ERJ-00951-2022.Figure_S6.pdf [file ERJ-00951-2022.Figure_S6.pdf]

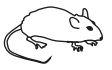

*In vivo*

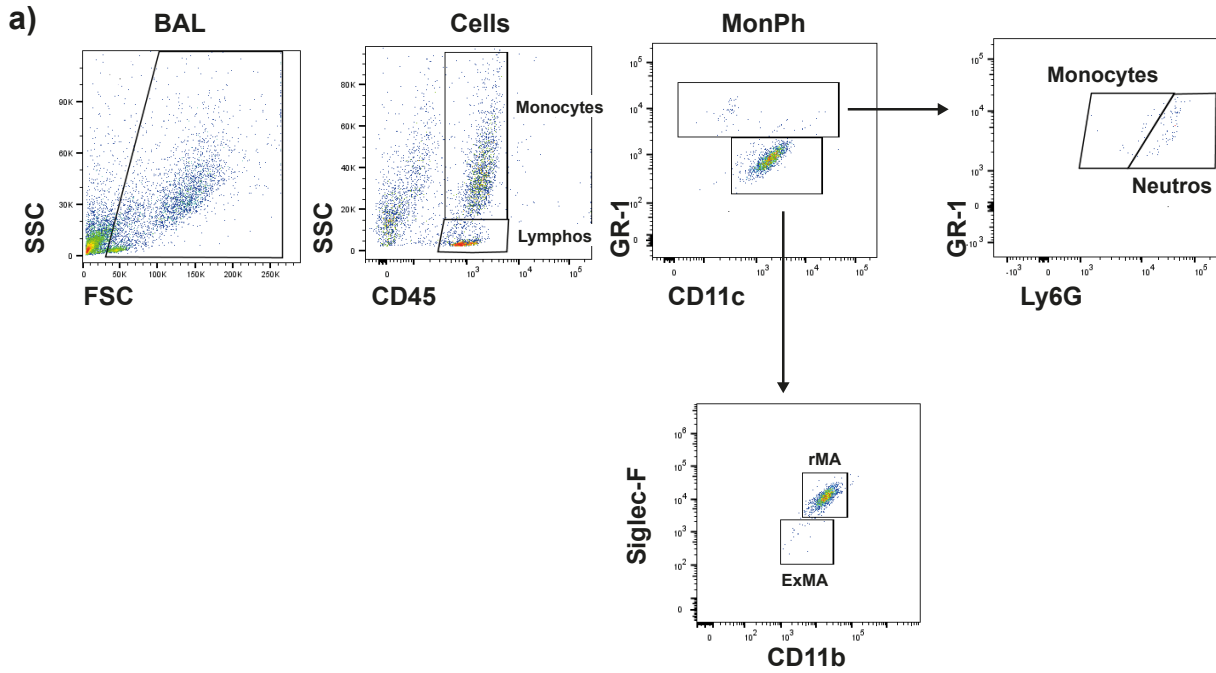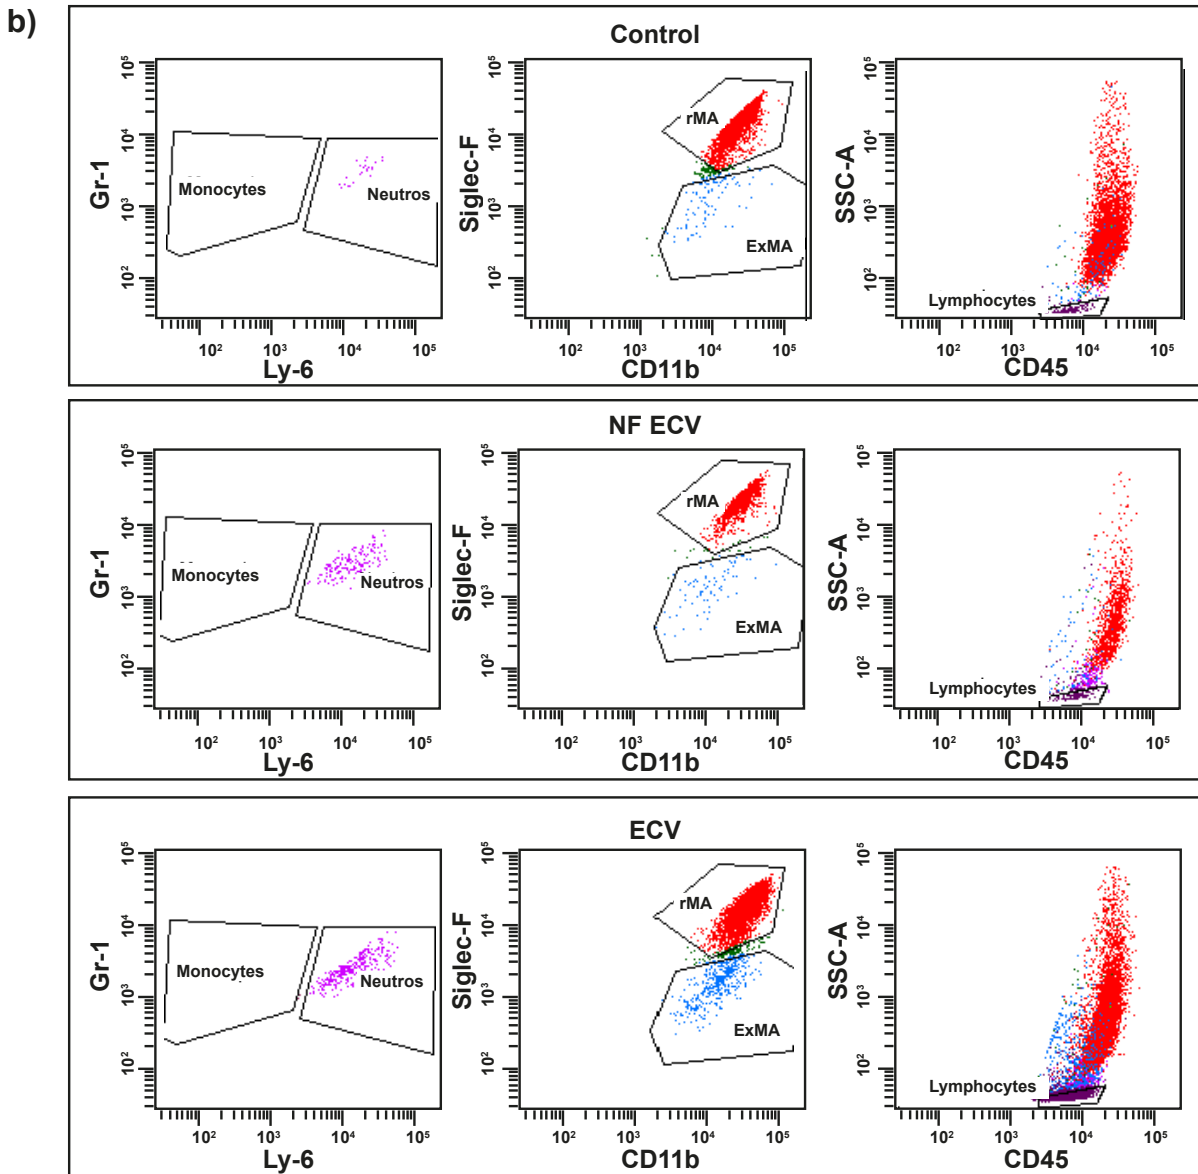

**Supplementary figure S6. Effect of long-term *in vivo* exposure to ECV or NF ECV on immune cell composition of bronchoalveolar lavage (BAL).**

**a)** Flow cytometry gating strategy. First, the total BAL cells were gated with forward scatter (FSC) and side scatter (SSC). From the total BAL cells, the lymphocytes were gated based on low FSC and low SSC within the CD45<sup>+</sup> cluster. The mononuclear phagocytes (MonPh) were gated based on the higher FSC and/or SSC within the CD45<sup>+</sup> cluster. From the MonPh cluster, the CD11c<sup>+</sup>Gr-1<sup>-</sup> population was sub-gated to differentiate resident macrophages (rAMs: CD11b<sup>hi</sup>Siglec-F<sup>hi</sup>) and exudate macrophages (ExMAs: CD11b<sup>hi</sup>Siglec-F<sup>low</sup>). From the MonPh cluster, the CD11c<sup>-</sup>Gr-1<sup>+</sup> population was sub-gated to identify neutrophils (GR-1<sup>+</sup>Ly6G<sup>hi</sup>) and monocytes (GR-1<sup>+</sup>Ly6G<sup>-</sup>).

**b)** Representative flow cytometry plots of the bronchoalveolar lavage (BAL) from mice exposed to either nicotine-free e-cigarette vapour (NF ECV) or nicotine-containing e-cigarette vapour (ECV) for 8 months. Control animals received room air only.
