# Supplementary material for: Nicotine promotes e-cigarette vapour-induced lung inflammation and structural alterations
Source: PubMed Central journal article supplement — Eur Respir J. 2023 Jun 22;61(6):2200951. doi: 10.1183/13993003.00951-2022 (PMC10285110; doi:10.1183/13993003.00951-2022), 2023-06-22
Supplement: ERJ-00951-2022.Figure_S7.pdf [file ERJ-00951-2022.Figure_S7.pdf]

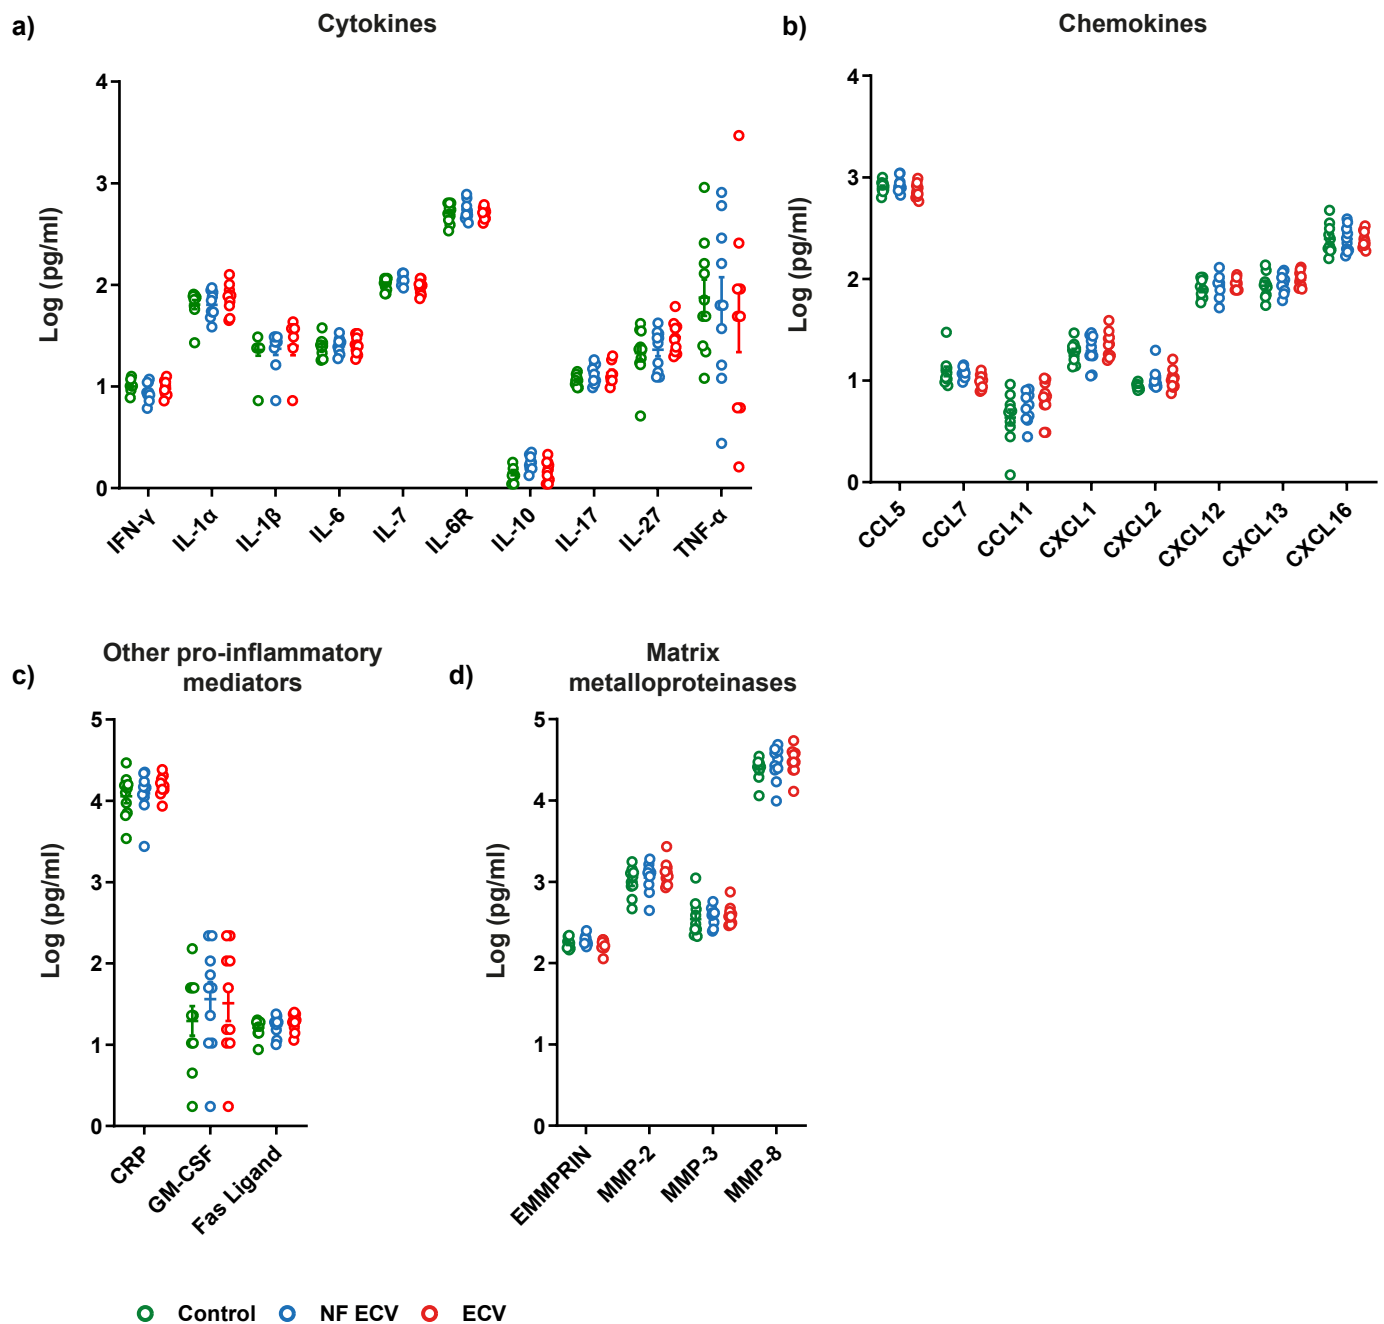

### Supplementary figure S7. Multiplex analysis of bronchoalveolar lavage fluid (BALF).

**a-d)** Analysis of multiplex immunoassay screening for cytokines (**a**), chemokines (**b**), other pro-inflammatory mediators (**c**) and matrix metalloproteinases (**d**) in BALF from mice exposed to either nicotine-free e-cigarette vapour (NF ECV) or nicotine-containing e-cigarette vapour (ECV) for 8 months. Control animals were treated with room air only.

Statistical analysis was performed by one-way ANOVA with Tukeys post hoc-test. n=10 mice per group. No significant differences could be observed between the Control, NF ECV and ECV groups.

Abbreviation: CCL – (C-C motif) ligands; CRP – c reactive protein; EMMPRIN – extracellular matrix metalloproteinase inducer; GF - CSF – granulocyte-macrophage colony-stimulating factor; IL – Interleukin; IFN- $\gamma$  – interferon gamma; MMP – matrix metalloproteinase; TNF- $\alpha$  - tumor necrosis factor alpha.
