# Supplementary material for: Nicotine promotes e-cigarette vapour-induced lung inflammation and structural alterations
Source: PubMed Central journal article supplement — Eur Respir J. 2023 Jun 22;61(6):2200951. doi: 10.1183/13993003.00951-2022 (PMC10285110; doi:10.1183/13993003.00951-2022), 2023-06-22
Supplement: ERJ-00951-2022.Figure_S8.pdf [file ERJ-00951-2022.Figure_S8.pdf]

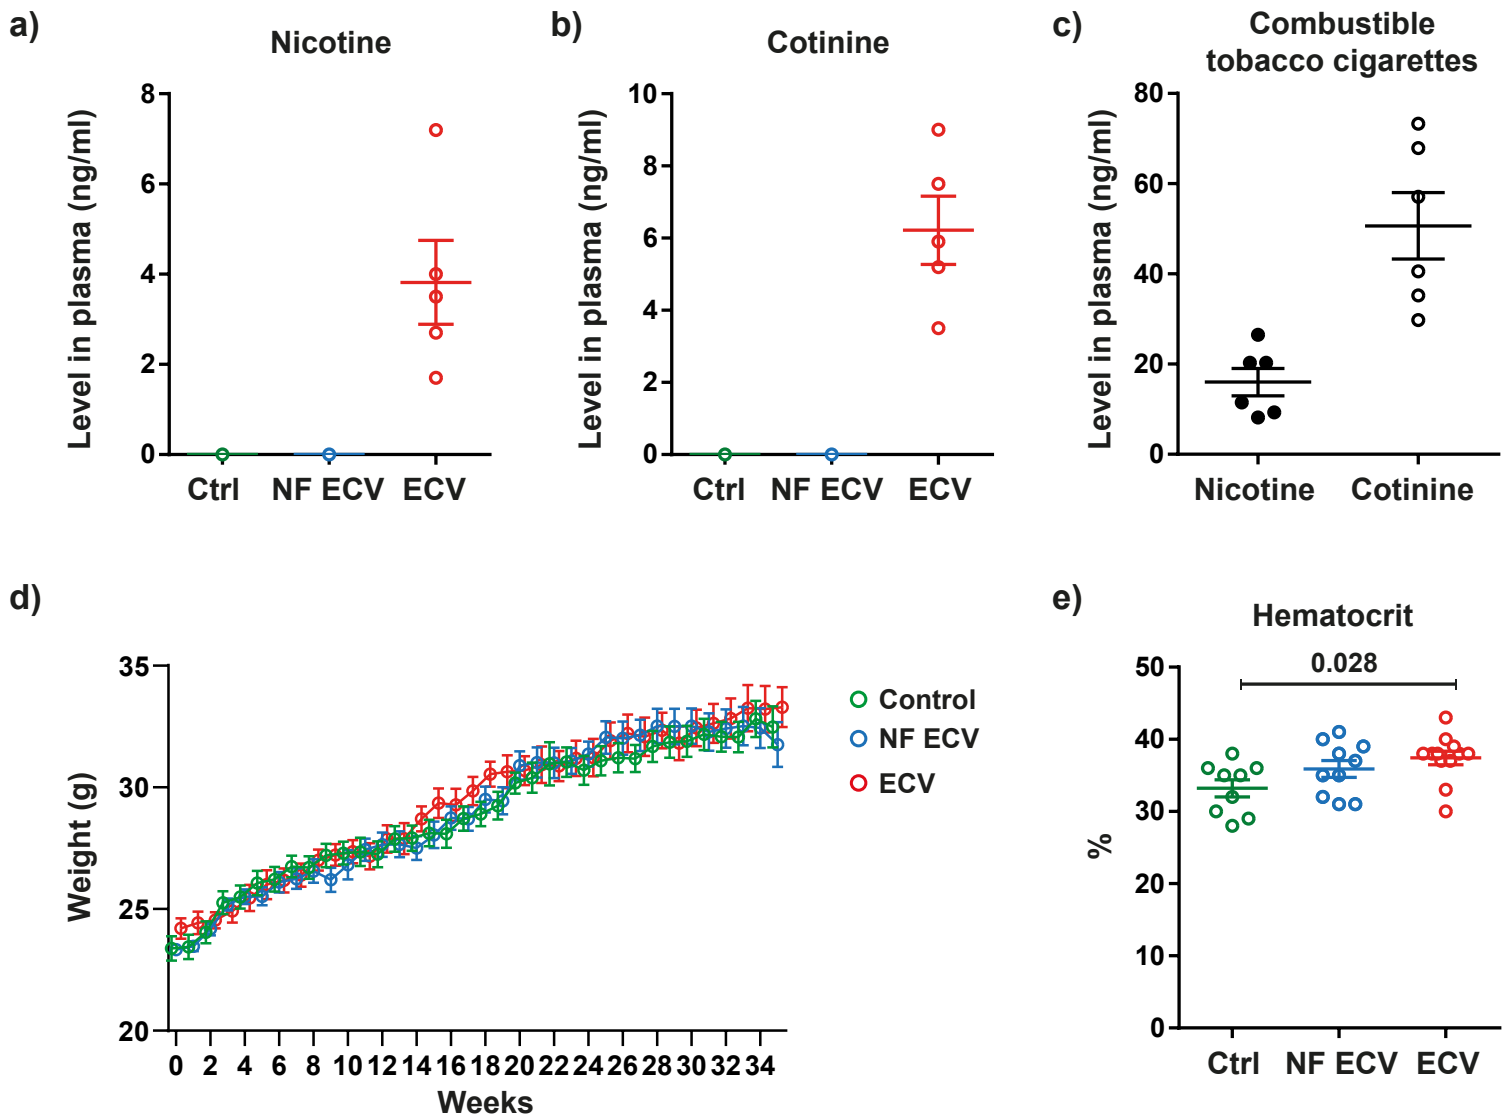

**Supplementary figure S8. Effect of long-term *in vivo* exposure to ECV or NF ECV on nicotine, cotinine concentrations and on hematocrit.**

**a, b)** Concentrations of nicotine (**a**) and cotinine (**b**) in the plasma of mice exposed to nicotine-free e-cigarette vapour (NF ECV) or nicotine-containing e-cigarette vapour (ECV) for 6h (n=5). **c)** Nicotine and cotinine concentration in the plasma of mice exposed to conventional CS for 6h (n=6). **d)** Mouse weight during the time course of exposure to NF ECV or ECV for 8 months. n=12 mice per group. **e)** Hematocrit (n=9-12) of mice exposed to NF ECV or ECV for 8 months. Control animals were treated with room air only. Statistical analysis was performed by one-way ANOVA with Tukeys post hoc-test. Data are presented as mean  $\pm$  SEM.
